# Supplementary material for: Advanced photoelectrochemical performance of inverse-opal heterostructures fabricated using hydrogenated ZnO and TiO2
Source: Royal Society of Chemistry journal article supplement (doi:10.1039/d4tc01582g), 2024-01-01
Supplement: d4tc01582g1.pdf [file d4tc01582g1.pdf]

## Supplementary Information

### Advanced Photoelectrochemical Performance of Inverse-opal Heterostructures Fabricated using Hydrogenated ZnO and TiO<sub>2</sub>

Zheli Wu<sup>a</sup>, Jie Long<sup>a</sup>, Ming Fu<sup>a,\*</sup>, Xiaoyu Liu<sup>a</sup>, Jiefeng Li<sup>a</sup>, Peixin Chu<sup>a</sup>, Chenhui Wei<sup>a</sup>, Yuting Zhang<sup>a</sup>,  
Yijun Ning<sup>b</sup>, Dawei He<sup>a</sup>, Yongsheng Wang<sup>a</sup>

<sup>a</sup>Key Laboratory of Luminescence and Optical Information, Ministry of Education, Institute of Optoelectronic Technology, Beijing Jiaotong University, Beijing 100044, PR China

<sup>b</sup>School of Optical and Electronic Information, Suzhou City University, Suzhou 215104, PR China

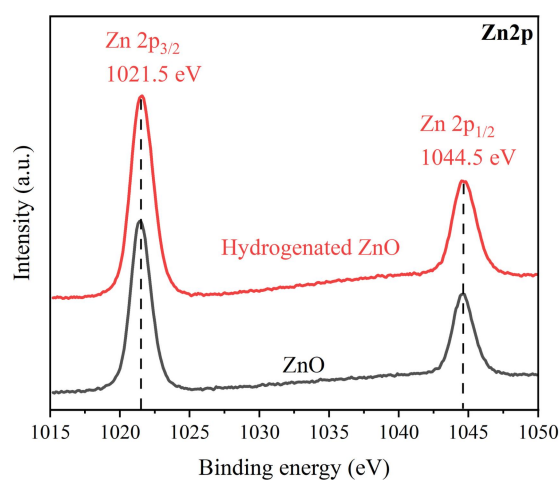

Figure S1 Zn 2p XPS spectra of ZnO IOs and H:ZnO IOs.

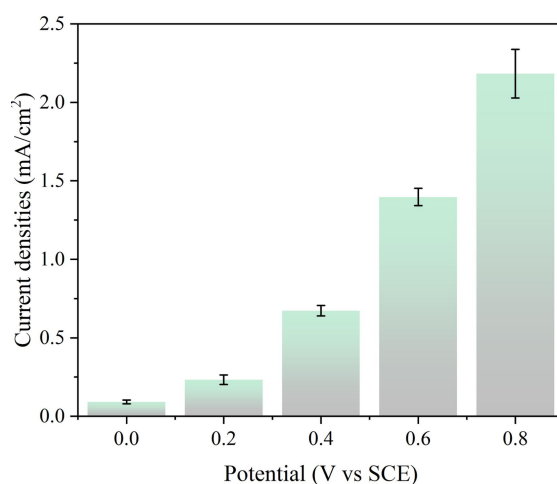

Figure S2 Current densities of 195 nm H:ZnO 350°C 3h IOs at different applied biases with error bars.

Table S1 Comparative results of the recently reported ZnO-based photoanode materials

| Samples                                          | Photocurrent densities at applied bias   | Testing conditions                                                                 | References |
|--------------------------------------------------|------------------------------------------|------------------------------------------------------------------------------------|------------|
| TiO <sub>2</sub> nanorod                         | 0.51 mA/cm <sup>2</sup> at 1.23 V vs RHE | 0.1 M NaOH                                                                         | 1          |
| TiO <sub>2</sub> nanotube                        | 0.32 mA/cm <sup>2</sup> at 1.23 V vs RHE | 1 M KOH                                                                            | 2          |
| TiO <sub>2</sub> nanorod arrays                  | 0.73 mA/cm <sup>2</sup> at 1.23 V vs RHE | 1 M Na <sub>2</sub> SO <sub>4</sub>                                                | 3          |
| TiO <sub>2</sub> inverse opal                    | 0.56 mA/cm <sup>2</sup> at 1.23 V vs RHE | 0.5 M Na <sub>2</sub> SO <sub>4</sub>                                              | 4          |
| ZnO nanorod                                      | 0.92 mA/cm <sup>2</sup> at 1.23 V vs RHE | 0.1 M KOH                                                                          | 5          |
| ZnO inverse opal                                 | 0.99 mA/cm <sup>2</sup> at 1.23 V vs RHE | 0.25 M Na <sub>2</sub> S/0.35 M Na <sub>2</sub> SO <sub>3</sub>                    | 6          |
| ZnO nanotube                                     | 0.60 mA/cm <sup>2</sup> at 1.23 V vs RHE | 0.35 M Na <sub>2</sub> S/0.25 M Na <sub>2</sub> SO <sub>3</sub>                    | 7          |
| Hydrogenated ZnO nanoparticles                   | 4.20 μA /cm <sup>2</sup> at 0 V vs SCE   | 0.1 M Na <sub>2</sub> SO <sub>4</sub> under visible-light irradiation (λ > 420 nm) | 8          |
| Hydrogenated ZnO nanoparticles                   | 9.50 μA /cm <sup>2</sup> at 0 V vs SCE   | 0.1 M Na <sub>2</sub> SO <sub>4</sub> under UV-light irradiation (λ = 254 nm )     | 8          |
| Hydrogenated ZnO nanorod arrays                  | 1.00 μA /cm <sup>2</sup> at 0.1 V vs SCE | 1.0 M CH <sub>3</sub> OH                                                           | 9          |
| Hydrogenated ZnO/CdS core-shell nanorod arrays   | 7.40 μA /cm <sup>2</sup> at 0.5 V vs SCE | 1.0 M CH <sub>3</sub> OH                                                           | 9          |
| Hydrogenated ZnO nanorods                        | 0.62 mA/cm <sup>2</sup> at 1.6 V vs SCE  | 0.5 M Na <sub>2</sub> SO <sub>4</sub>                                              | 10         |
| Hydrogenated TiO <sub>2</sub> /ZnO inverse opals | 1.77 mA/cm <sup>2</sup> at 0.6 V vs SCE  | 0.5 M Na <sub>2</sub> SO <sub>4</sub>                                              | This work  |

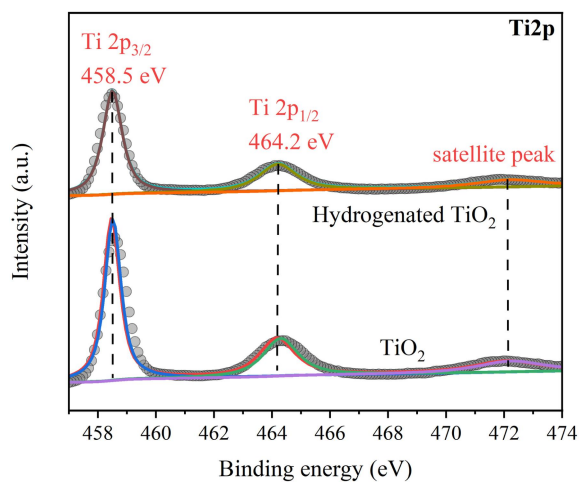

Figure S3 Ti 2p XPS spectra of TiO<sub>2</sub> IOs and H: TiO<sub>2</sub> IOs.

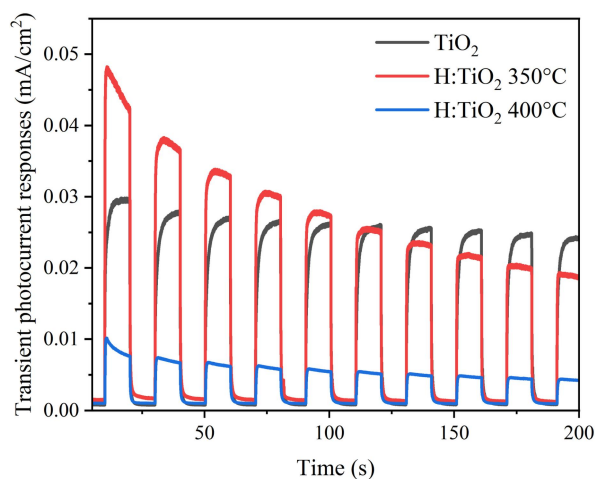

Figure S4 Transient photocurrent responses ( $100 \text{ mW/cm}^2$ ,  $0.6 \text{ V vs SCE}$ ) of H:TiO<sub>2</sub> IOs synthesized by 60 circles of ALD using 255 nm colloidal crystal templates, annealed at different temperatures for 3 hours.

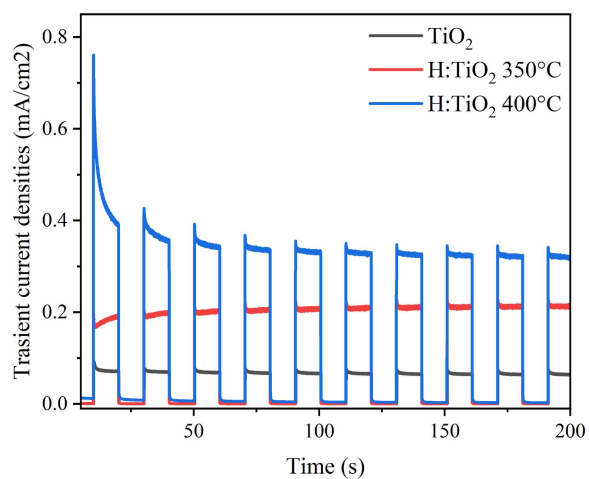

Figure S5 Transient photocurrent responses ( $100 \text{ mW/cm}^2$ ,  $0.6 \text{ V vs SCE}$ ) of H:TiO<sub>2</sub> IOs synthesized by 150 circles of ALD using 255 nm colloidal crystal templates, annealed at different temperatures for 3 hours.

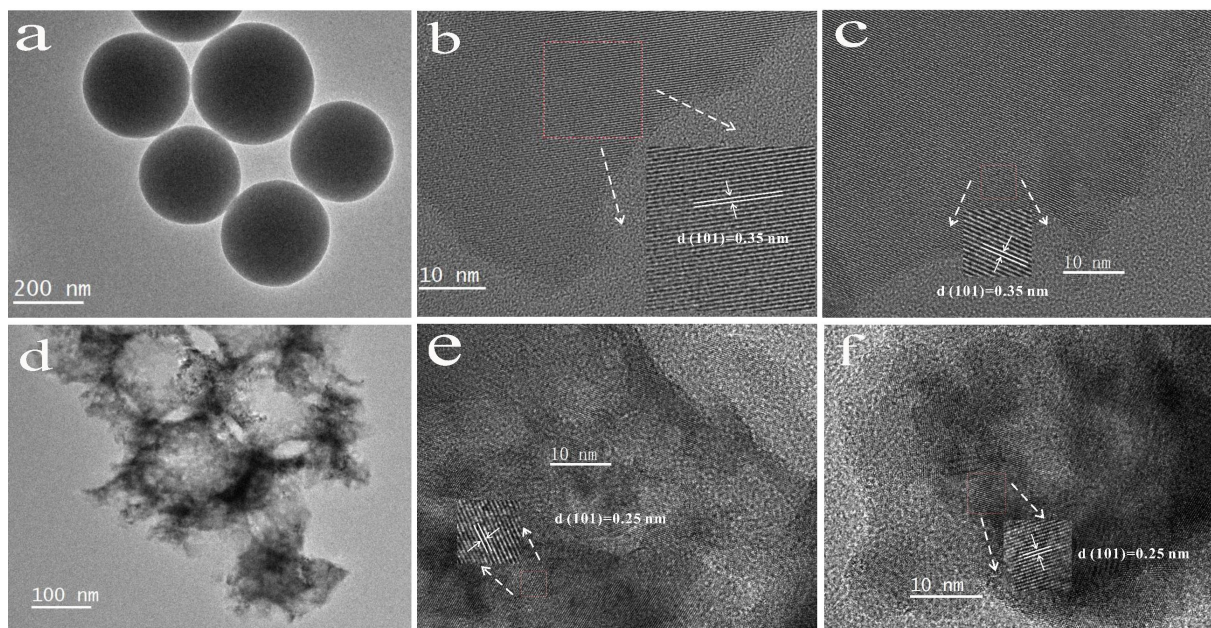

Figure S6 HRTEM images of (a), (b)TiO<sub>2</sub>, (c)hydrogenated TiO<sub>2</sub>, (d), (e)ZnO, and (f) hydrogenated ZnO inverse opals.

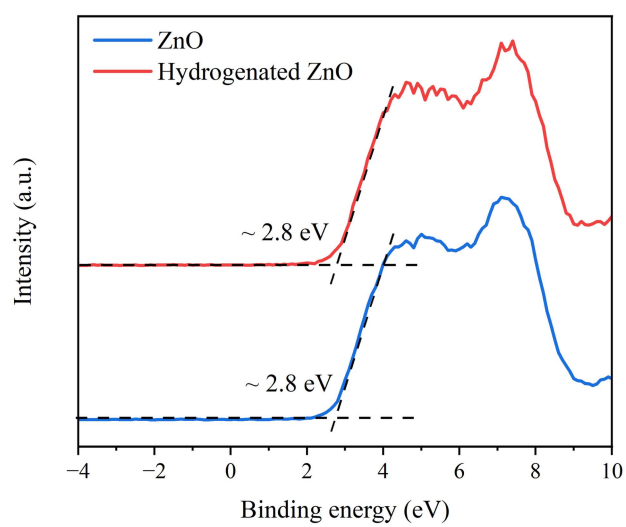

Figure S7 XPS valence band spectra of the pristine ZnO and the H:ZnO IOs.

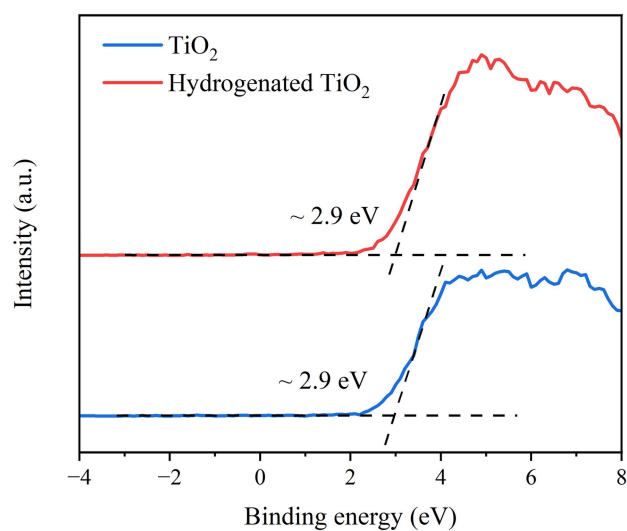

Figure S8 XPS valence band spectra of the pristine  $\text{TiO}_2$  and the H: $\text{TiO}_2$  IOs.

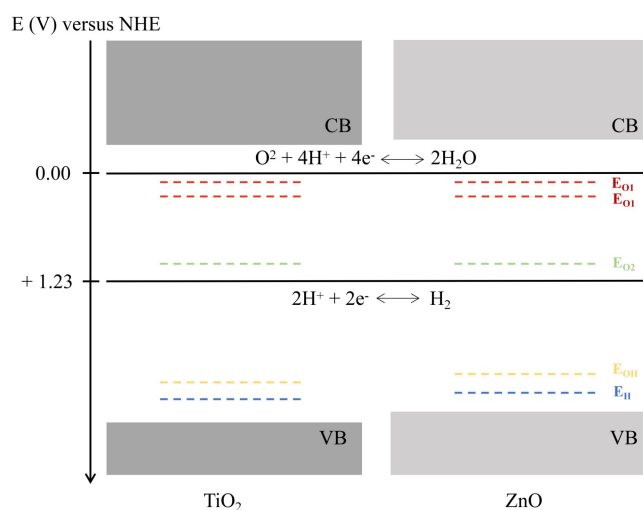

Figure S9 Simplified energy diagram of hydrogenated ZnO and hydrogenated  $\text{TiO}_2$ .  $E_{O1}$  and  $E_{O2}$  are referred to the energy levels of surface oxygen vacancies and bulk oxygen vacancies, respectively.  $E_{OH}$  indicates the energy levels of surface hydroxyl group.  $E_H$  represents the energy levels of interstitial hydrogen.

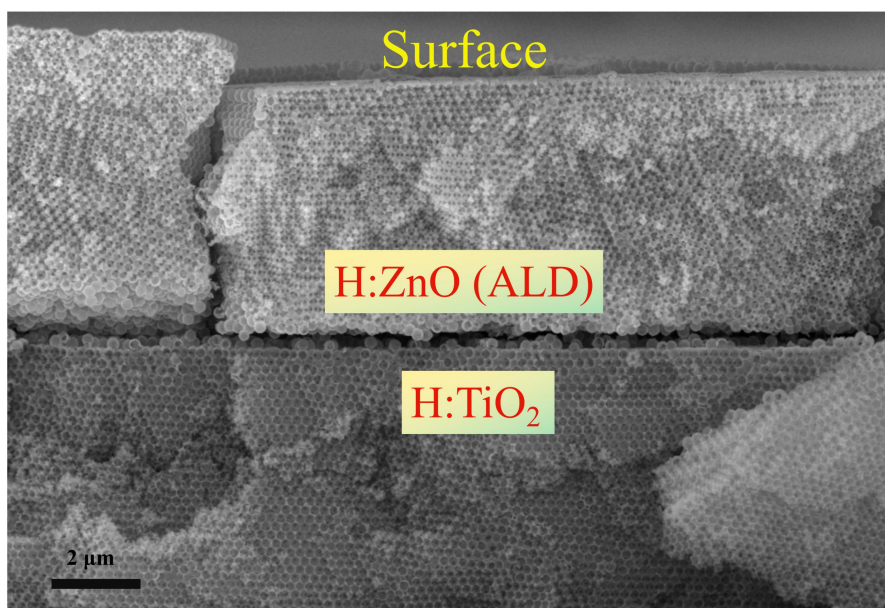

Figure S10 The cross-section SEM image of H:TiO<sub>2</sub>/ZnO (ALD) IOs

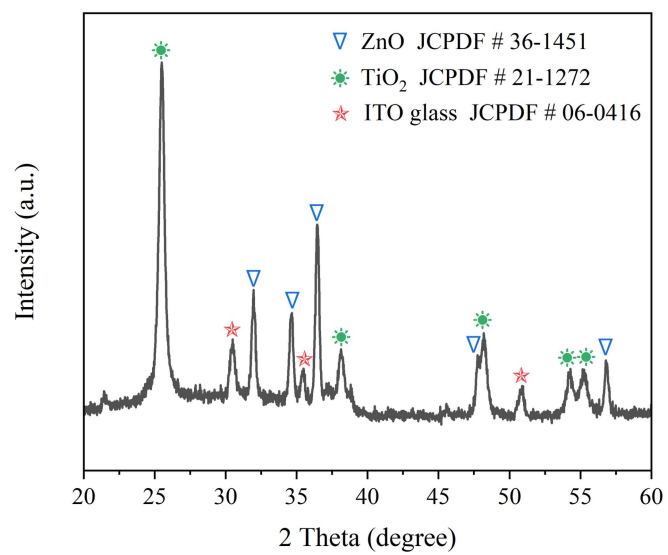

Figure S11 XRD pattern of the H:TiO<sub>2</sub>/H:ZnO (ele) IOs

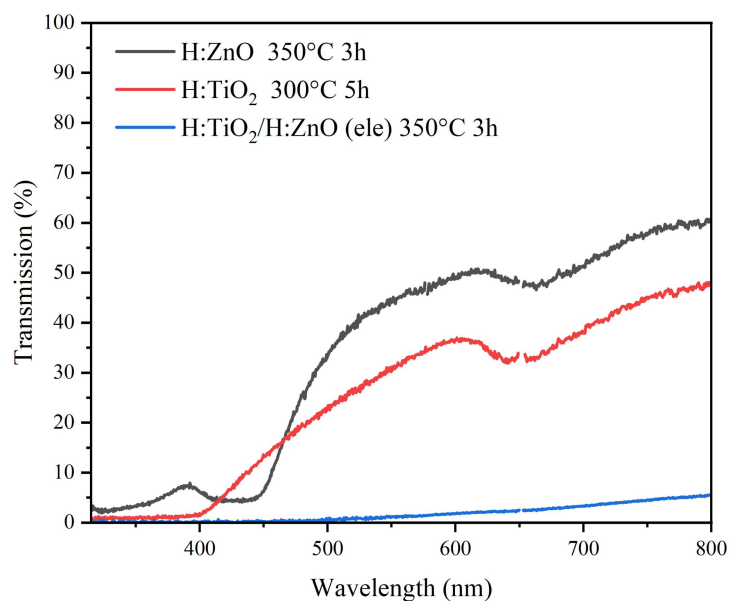

Figure S12 The transmission spectra of H:ZnO IOs, H:TiO<sub>2</sub> IOs, and H:TiO<sub>2</sub>/ZnO (ele) IOs.

## Notes and references

- 1 C. Chen, Y. Wei, G. Yuan, Q. Liu, R. Lu, X. Huang, Y. Cao and P. Zhu, Synergistic effect of Si doping and heat treatments enhances the photoelectrochemical water oxidation performance of TiO<sub>2</sub> nanorod arrays, *Adv. Funct. Mater.*, 2017, **27**, 1701575.
- 2 Y. Xu, M. A. Melia, L.-k. Tsui, J. M. Fitz-Gerald and G. Zangari, Laser-induced surface modification at anatase TiO<sub>2</sub> nanotube array photoanodes for photoelectrochemical water oxidation, *J. Phys. Chem. C*, 2017, **121**, 17121-17128.
- 3 M. P. Suryawanshi, U. V. Ghorpade, S. W. Shin, M. G. Gang, X. Wang, H. Park, S. H. Kang and J. H. Kim, Enhanced solar water oxidation performance of TiO<sub>2</sub> via band edge engineering: a tale of sulfur doping and earth-abundant CZTS nanoparticles sensitization, *ACS Catal.*, 2017, **7**, 8077-8089.
- 4 R. Boppella, S. T. Kochuveedu, H. Kim, M. J. Jeong, F. Marques Mota, J. H. Park and D. H. Kim, Plasmon-sensitized graphene/TiO<sub>2</sub> inverse opal nanostructures with enhanced charge collection efficiency for water splitting, *ACS Appl. Mater. Inter.*, 2017, **9**, 7075-7083.
- 5 X. Li, S. Liu, K. Fan, Z. Liu, B. Song and J. Yu, MOF - based transparent passivation layer modified ZnO nanorod arrays for enhanced photoelectrochemical water splitting, *Adv. Energy Mater.*, 2018, **8**, 1800101.
- 6 Y. Zeng, T. Yang, C. Li, A. Xie, S. Li, M. Zhang and Y. Shen, Zn<sub>x</sub>Cd<sub>1-x</sub>Se nanoparticles decorated ordered mesoporous ZnO inverse opal with binder-free heterojunction interfaces for highly efficient photoelectrochemical water splitting, *Appl. Catal. B-Environ.*, 2019, **245**, 469-476.
- 7 J. Long, W. Wang, S. Fu and L. Liu, Hierarchical architectures of wrinkle-like ZnFe<sub>2</sub>O<sub>4</sub> nanosheet-enwrapped ZnO nanotube arrays for remarkably photoelectrochemical water splitting to produce hydrogen, *J. Colloid Interface Sci.*, 2019, **536**, 408-413.



- 8 Y. Lv, W. Yao, X. Ma, C. Pan, R. Zong and Y. Zhu, The surface oxygen vacancy induced visible activity and enhanced UV activity of a ZnO<sub>1-x</sub> photocatalyst, *Catal. Sci. Technol.*, 2013, **3**, 3136-3146.
- 9 H. Li, C. Yao, L. Meng, H. Sun, J. Huang and Q. Gong, Photoelectrochemical performance of hydrogenated ZnO/CdS core-shell nanorod arrays, *Electrochim. Acta*, 2013, **108**, 45-50.
- 10 V. Gurylev, C.-Y. Su and T.-P. Perng, Hydrogenated ZnO nanorods with defect-induced visible light-responsive photoelectrochemical performance, *Appl. Surf. Sci.*, 2017, **411**, 279-284.
